# Supplementary material
Source: PubMed Central journal article supplement (PMC5241710)
Supplement: tx6b00366_si_001.pdf [file tx6b00366_si_001.pdf]

# Supporting Information

## Title: Biomonitoring Human Albumin Adducts: The Past, the Present and the Future

**Gabriele Sabbioni<sup>\*,1,2,3</sup> and Robert J. Turesky<sup>\*,4</sup>**

<sup>1</sup>Institute of Environmental and Occupational Toxicology, CH-6780 Airolo, Switzerland; <sup>2</sup>Alpine Institute of Chemistry and Toxicology, CH-6718 Olivone, Switzerland; <sup>3</sup>Walther-Straub-Institut für Pharmakologie und Toxikologie, Ludwig-Maximilians-Universität München, D-80336 München.

<sup>4</sup>Masonic Cancer Center and Department of Medicinal Chemistry, College of Pharmacy, University of Minnesota, 2231 6th St SE, Minneapolis, MN 55455, USA

\*Corresponding authors:

Gabriele Sabbioni, Institute of Environmental and Occupational Toxicology, Casella Postale 108, CH-6780 Airolo, Switzerland, Tel.: +41-91-8691362, email: [gabriele.sabbioni@bluewin.ch](mailto:gabriele.sabbioni@bluewin.ch)

Robert J. Turesky, Masonic Cancer Center and Department of Medicinal Chemistry, Cancer and Cardiology Research Building, University of Minnesota, 2231 6th Street, Minneapolis, MN 55455, USA. Tel.: +1 612-626-0141; fax: +1 612-624-3869., email: [rturesky@umn.edu](mailto:rturesky@umn.edu)

### Table of content:

Table S1. In vitro modification of human serum albumin (Alb) with chemicals and determination of the reacting amino acid by MS in tryptic digests.

Figure S1. Alb adducts of naphthalene.





**Table S1.** In vitro modification of human serum albumin (Alb) with chemicals and determination of the reacting amino acid by MS in tryptic digests.

|                        | <sup>a)</sup> MDI <sup>1</sup> | MDI <sup>2</sup> | TDI <sup>3</sup>  | HDI <sup>4</sup> | TDI-GSH <sup>5</sup> | TOCP <sup>6</sup> | OP <sup>7</sup> | Nap <sup>8</sup> | Tol <sup>9</sup> | Ben <sup>10</sup> | Zom <sup>9</sup> | ASA <sup>11</sup> | Pen <sup>12,13</sup> | Nevp <sup>14</sup> | AX <sup>15</sup> | HNE <sup>16</sup>                  | Glc <sup>17</sup>            | Glc <sup>18</sup> | Glc <sup>19</sup> | But <sup>20</sup> | Peroxy <sup>21</sup> | MG <sup>22</sup>                          | Met <sup>23-25</sup> | H <sub>2</sub> O <sub>2</sub> <sup>19</sup> | Cu-II <sup>19</sup> | MDA <sup>26</sup> |                       |
|------------------------|--------------------------------|------------------|-------------------|------------------|----------------------|-------------------|-----------------|------------------|------------------|-------------------|------------------|-------------------|----------------------|--------------------|------------------|------------------------------------|------------------------------|-------------------|-------------------|-------------------|----------------------|-------------------------------------------|----------------------|---------------------------------------------|---------------------|-------------------|-----------------------|
| <sup>b)</sup> Chem/Alb | 1:1/5:1/10:1/40:1              | 160:1            | 1:1/5:1/10:1/40:1 |                  | 60:1                 | 40:1              | ~1:1            | 2.2:1            | 40:1             | 50:1              | 40:1             | 5.3:1             | 60:1                 | 1:1/ 5:1/10:1      | 9:1/ 90:1        | 1:4/ 1:2/ 5:1<br>5:1 <sup>19</sup> | <sup>c)</sup> HSA            | 333:1             | 333:1             | 1:10              |                      | <2:1 <sup>21</sup><br>110:1 <sup>19</sup> | 5:1                  | 34:1 <sup>23</sup><br>165:1 <sup>24</sup>   | 167:1               | 83:1              | <sup>h)</sup> 1-100:1 |
| Lys-439                | o / o / o / x                  |                  | o / o / x / x     |                  |                      |                   |                 |                  |                  |                   |                  |                   |                      |                    |                  |                                    | <sup>d)</sup> x              |                   |                   |                   |                      |                                           |                      |                                             |                     |                   |                       |
| His-440                |                                |                  |                   |                  |                      |                   |                 |                  |                  |                   |                  |                   |                      |                    |                  | x <sup>19</sup>                    |                              |                   |                   |                   |                      |                                           |                      |                                             |                     |                   |                       |
| Lys-444                | o / o / o / x                  |                  | x / x / x / x     |                  |                      |                   |                 |                  |                  |                   |                  |                   |                      |                    |                  |                                    |                              | x                 | x                 |                   |                      |                                           | x                    |                                             |                     |                   |                       |
| Met-446                |                                |                  |                   |                  |                      |                   |                 |                  |                  |                   |                  |                   |                      |                    |                  |                                    |                              |                   |                   |                   |                      |                                           |                      | x                                           |                     |                   |                       |
| Tyr-452                |                                |                  |                   |                  |                      |                   | x               |                  |                  |                   |                  |                   |                      |                    |                  |                                    |                              |                   |                   |                   |                      |                                           |                      |                                             |                     |                   |                       |
| His-464                |                                |                  |                   |                  |                      |                   |                 |                  |                  |                   |                  |                   |                      |                    |                  |                                    |                              |                   |                   |                   |                      |                                           |                      |                                             |                     | x                 |                       |
| Ser-470                |                                |                  |                   |                  |                      |                   |                 |                  |                  | x                 |                  |                   |                      |                    |                  |                                    |                              |                   |                   |                   |                      |                                           |                      |                                             |                     |                   |                       |
| Arg-472                |                                |                  |                   |                  |                      |                   |                 |                  |                  |                   |                  |                   |                      |                    |                  |                                    | <sup>f)</sup> x              |                   |                   |                   |                      |                                           | x                    |                                             |                     |                   |                       |
| Ser-480                |                                |                  |                   |                  |                      |                   |                 |                  |                  | x                 |                  |                   |                      |                    |                  |                                    |                              |                   |                   |                   |                      |                                           |                      |                                             |                     |                   |                       |
| Pro-486                |                                |                  |                   |                  |                      |                   |                 |                  |                  |                   |                  |                   |                      |                    |                  |                                    |                              |                   |                   |                   |                      |                                           | x                    |                                             |                     |                   |                       |
| Ser-489                |                                |                  |                   |                  |                      |                   |                 |                  |                  | x                 |                  |                   |                      |                    |                  |                                    |                              |                   |                   |                   |                      |                                           |                      |                                             |                     |                   |                       |
| Tyr-497                |                                |                  |                   |                  |                      |                   |                 |                  |                  |                   |                  |                   |                      |                    |                  |                                    |                              |                   |                   |                   |                      |                                           |                      |                                             |                     |                   |                       |
| His-510                |                                |                  |                   |                  |                      |                   |                 |                  |                  |                   |                  |                   |                      |                    |                  |                                    | o / o / x<br>x <sup>19</sup> |                   |                   |                   |                      |                                           |                      |                                             |                     | x                 |                       |
| Lys-519                |                                |                  |                   |                  |                      |                   |                 |                  |                  |                   |                  |                   |                      |                    |                  |                                    |                              |                   | x                 |                   |                      |                                           |                      |                                             |                     |                   |                       |
| Lys-524                | o / x / x / x                  |                  | x / x / x / x     |                  |                      |                   |                 |                  | x                |                   |                  |                   |                      |                    |                  |                                    |                              |                   |                   |                   |                      |                                           | x                    |                                             |                     |                   |                       |
| <sup>i)</sup> Lys-525  | x / x / x / x                  | x                | x / x / x / x     |                  | x                    | x                 |                 | x                |                  |                   |                  |                   |                      |                    |                  |                                    | o / o / x                    | x                 | x                 | x                 |                      |                                           |                      |                                             |                     |                   | X                     |
| Thr-527                |                                |                  |                   |                  |                      |                   |                 |                  |                  |                   |                  |                   |                      |                    |                  |                                    |                              |                   |                   |                   |                      |                                           | x                    |                                             |                     |                   |                       |
| Lys-534                | o / x / x / x                  |                  | o / x / x / x     |                  |                      |                   |                 |                  |                  |                   |                  |                   |                      |                    |                  |                                    |                              |                   |                   |                   |                      |                                           |                      |                                             |                     |                   |                       |
| Lys-536                | x / x / x / x                  |                  | o / x / x / x     |                  |                      |                   |                 |                  | x                |                   |                  |                   |                      |                    |                  |                                    |                              |                   | x                 |                   |                      |                                           |                      |                                             |                     |                   |                       |
| Lys-538                |                                |                  |                   |                  |                      |                   |                 |                  |                  |                   |                  |                   |                      |                    |                  |                                    | <sup>d)</sup> x              |                   |                   |                   |                      |                                           |                      |                                             |                     |                   |                       |
| <sup>i)</sup> Lys-541  | o / o / o / x                  | x                | o / x / x / x     |                  |                      |                   |                 | x                |                  |                   |                  |                   | x                    |                    | x / x            |                                    |                              |                   |                   |                   |                      |                                           | x                    |                                             |                     |                   | x                     |
| Lys-545                |                                |                  | o / x / x / x     |                  |                      |                   |                 |                  |                  |                   |                  |                   | x                    |                    | o / x            |                                    |                              | x                 | x                 |                   |                      |                                           |                      |                                             |                     |                   |                       |
| Met-548                |                                |                  |                   |                  |                      |                   |                 |                  |                  |                   |                  |                   |                      |                    |                  |                                    |                              |                   |                   |                   |                      |                                           |                      |                                             | x                   |                   |                       |
| Lys-557                |                                |                  | o / o / x / x     |                  |                      |                   |                 |                  |                  |                   |                  |                   |                      |                    |                  |                                    |                              |                   |                   |                   |                      |                                           |                      |                                             |                     |                   |                       |
| Lys-560                |                                |                  | o / o / x / x     |                  |                      |                   |                 |                  |                  |                   |                  |                   |                      |                    |                  |                                    |                              |                   |                   |                   |                      |                                           |                      |                                             |                     |                   |                       |
| Thr-566                |                                |                  |                   |                  |                      |                   |                 |                  |                  |                   |                  |                   |                      |                    |                  |                                    |                              |                   |                   |                   |                      |                                           | x                    |                                             |                     |                   |                       |
| Lys-573                |                                |                  | x / x / x / x     |                  |                      |                   |                 |                  |                  |                   |                  |                   |                      |                    |                  |                                    |                              |                   | x                 |                   |                      |                                           |                      |                                             |                     |                   |                       |
| Lys-574                |                                |                  | x / x / x / x     |                  |                      |                   |                 |                  |                  |                   |                  |                   |                      |                    |                  |                                    |                              |                   |                   |                   |                      |                                           |                      |                                             |                     |                   |                       |

a) MDI=4,4'-Methylenediphenyl diisocyanate, TD=2,4-and 2,6-toluenediisocyanate, HDI=1,6-hexamethylene diisocyanate, TDI-GSH=adduct of glutathione with TDI, TOCP= tri-ortho-cresyl phosphate, OP= 10-fluoroethoxyphosphinyl-N-biotinamidopentyldecanamide (FP-biotin), Nap= naproxen acyl coenzyme A thioester, Tol=tolmetin acylglucuronide, Ben= benoxaprofen acyl glucuronide, zomepirac acyl glucunoride, ASA= acetylsalicylic acid, Pen=benzyl penicillin, Nevp= 12-Sulfoxyl-nevirapin, AX= amoxicillin, HNE=4-hydroxy-trans-2-nonenal, Glc=glycation adducts, But= epoxybutanediol, Peroxy= peroxyxynitrite, MG= methylglyoxal, Met=ascorbic acid metal catalyzed oxidation, Cu-II= CuSO<sub>4</sub> + ascorbic acid, MDA=malondialdehyde.

b) Chem/Alb= molar ratio of chemical to albumin. c) Minimally glycosylated HSA from Sigma-Aldrich. d) Fructosyl. e) Pyrraline. f) Nε-(5-hydro-4-imidazolone-2-yl) ornithine. g) Nε-[5-(2,3,4-trihydroxybutyl)-5-hydro-4-imidazolone-2-yl]ornithine or tetrahydropyrimidine. h) The number modified Lys increases with amount of MDA. i) Prolonged treatment of pure human albumin with chlorpyrifos oxon yielded also adducts with Tyr-150 and Tyr-16. j) several compounds reacting with Cys34 have not been included in this table but have been mentioned in the text; acetaminophen, sulfur mustard, benzene, naphthalene, aromatic amines, heterocyclic aromatic amines, styrene. k)



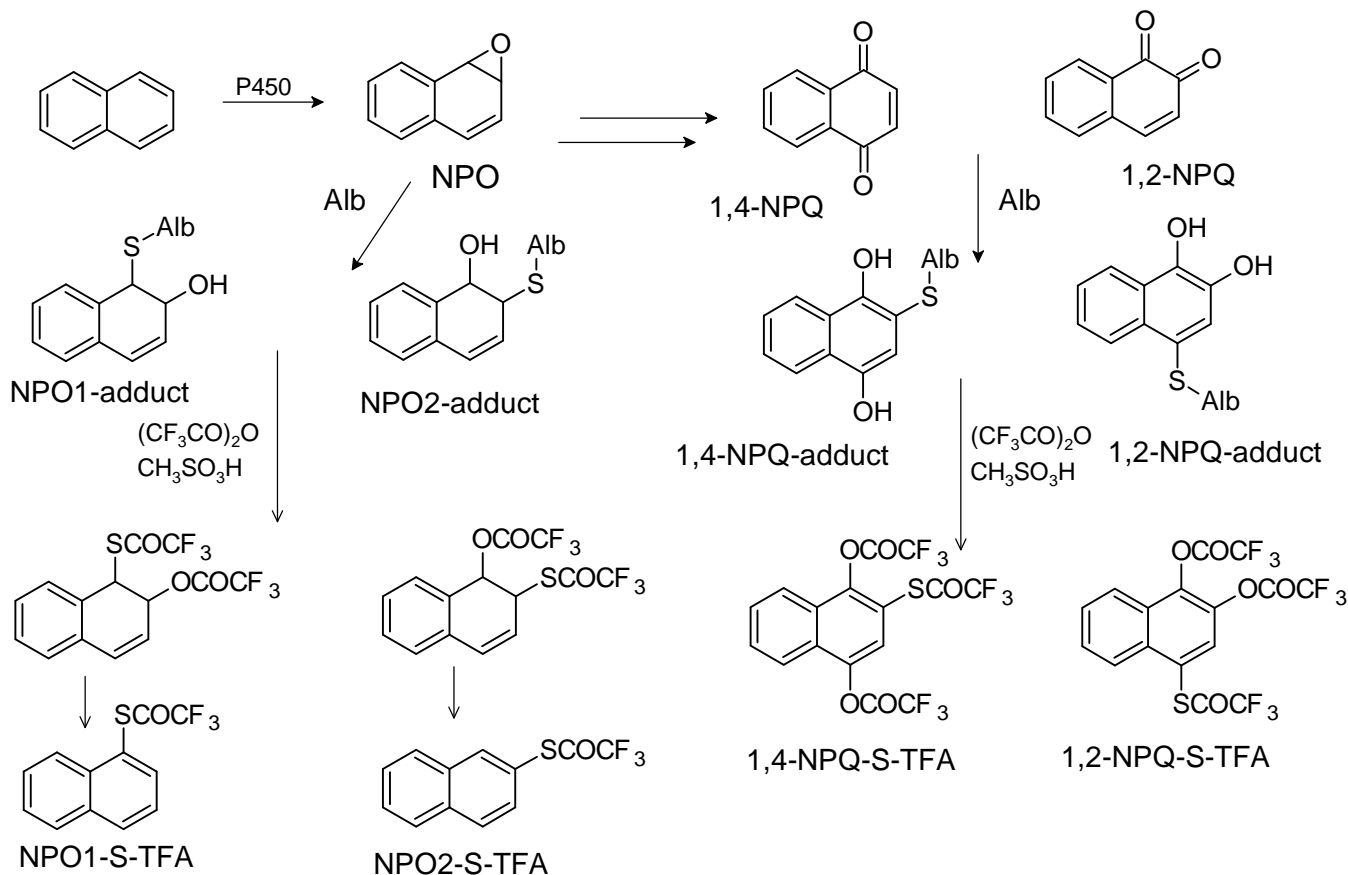

Figure S1. Alb adducts of naphthalene.<sup>31</sup>

- (1) Hettick, J. M., and Siegel, P. D. (2012) Comparative analysis of aromatic diisocyanate conjugation to human albumin utilizing multiplexed tandem mass spectrometry. *Int. J. Mass Spectrom.* 309 168-175.
- (2) Wisnewski, A. V., Liu, J., and Redlich, C. A. (2010) Antigenic changes in human albumin caused by reactivity with the occupational allergen diphenylmethane diisocyanate. *Anal. Biochem.* 400, 251-258.
- (3) Hettick, J. M., Siegel, P. D., Green, B. J., Liu, J., and Wisnewski, A. V. (2012) Vapor conjugation of toluene diisocyanate to specific lysines of human albumin. *Anal. Biochem.* 421, 706-711.
- (4) Campo, P., Wisnewski, A. V., Lummus, Z., Cartier, A., Malo, J. L., Boulet, L. P., and Bernstein, D. I. (2007) Diisocyanate conjugate and immunoassay characteristics influence detection of specific antibodies in HDI-exposed workers. *Clin. Exp. Allergy* 37, 1095-1102.
- (5) Wisnewski, A. V., Hettick, J. M., and Siegel, P. D. (2011) Toluene diisocyanate reactivity with glutathione across a vapor/liquid interface and subsequent transcarbamoylation of human albumin. *Chem. Res. Toxicol.* 24, 1686-1693.
- (6) Liyasova, M. S., Schopfer, L. M., and Lockridge, O. (2012) Cresyl saligenin phosphate, an organophosphorus toxicant, makes covalent adducts with histidine, lysine, and tyrosine residues of human serum albumin. *Chem. Res. Toxicol.* 25, 1752-1761.

- (7) Ding, S. J., Carr, J., Carlson, J. E., Tong, L., Xue, W., Li, Y., Schopfer, L. M., Li, B., Nachon, F., Asojo, O., Thompson, C. M., Hinrichs, S. H., Masson, P., and Lockridge, O. (2008) Five tyrosines and two serines in human albumin are labeled by the organophosphorus agent FP-biotin. *Chem. Res. Toxicol.* *21*, 1787-1794.
- (8) Olsen, J., Bjørnsdottir, I., Tjørnelund, J., and Honoré Hansen, S. (2003) Identification of the amino acids of human serum albumin involved in the reaction with the naproxen acyl coenzyme A thioester using liquid chromatography combined with fluorescence and mass spectrometric detection. *Anal. Biochem.* *312*, 148-156.
- (9) Zia-Amirhosseini, P., Ding, A., Burlingame, A. L., McDonagh, A. F., and Benet, L. Z. (1995) Synthesis and mass-spectrometric characterization of human serum albumins modified by covalent binding of two non-steroidal anti-inflammatory drugs: tolmetin and zomepirac. *Biochem. J.* *311 ( Pt 2)*, 431-435.
- (10) Qiu, Y., Burlingame, A. L., and Benet, L. Z. (1998) Mechanisms for covalent binding of benoxaprofen glucuronide to human serum albumin. Studies by tandem mass spectrometry. *Drug Metab. Dispos.* *26*, 246-256.
- (11) Walker, J. E. (1976) Lysine residue 199 of human serum albumin is modified by acetylsalicylic acid. *FEBS Lett.* *66*, 173-175.
- (12) Yvon, M., Anglade, P., and Wal, J. M. (1989) Binding of benzyl penicilloyl to human serum albumin. Evidence for a highly reactive region at the junction of domains 1 and 2 of the albumin molecule. *FEBS Lett.* *247*, 273-278.
- (13) Yvon, M., Anglade, P., and Wal, J. M. (1990) Identification of the binding sites of benzyl penicilloyl, the allergenic metabolite of penicillin, on the serum albumin molecule. *FEBS Lett.* *263*, 237-240.
- (14) Meng, X., Howarth, A., Earnshaw, C. J., Jenkins, R. E., French, N. S., Back, D. J., Naisbitt, D. J., and Park, B. K. (2013) Detection of drug bioactivation in vivo: mechanism of nevirapine-albumin conjugate formation in patients. *Chem. Res. Toxicol.* *26*, 575-583.
- (15) Ariza, A., Garzon, D., Abanades, D. R., de, I. R. V., Vistoli, G., Torres, M. J., Carini, M., Aldini, G., and Perez-Sala, D. (2012) Protein haptentation by amoxicillin: high resolution mass spectrometry analysis and identification of target proteins in serum. *J. Proteomics* *77*, 504-520.
- (16) Aldini, G., Gamberoni, L., Orioli, M., Beretta, G., Regazzoni, L., Maffei, F. R., and Carini, M. (2006) Mass spectrometric characterization of covalent modification of human serum albumin by 4-hydroxy-trans-2-nonenal. *J. Mass Spectrom.* *41*, 1149-1161.
- (17) Wa, C., Cerny, R. L., Clarke, W. A., and Hage, D. S. (2007) Characterization of glycation adducts on human serum albumin by matrix-assisted laser desorption/ionization time-of-flight mass spectrometry. *Clin. Chim. Acta* *385*, 48-60.
- (18) Lapolla, A., Fedele, D., Reitano, R., Arico, N. C., Seraglia, R., Traldi, P., Marotta, E., and Tonani, R. (2004) Enzymatic digestion and mass spectrometry in the study of advanced glycation end products/peptides. *J. Am. Soc. Mass Spectrom.* *15*, 496-509.
- (19) Goto, T., Murata, K., Lee, S. H., and Oe, T. (2013) Complete amino acid sequencing and immunoaffinity clean-up can facilitate screening of various chemical modifications on human serum albumin. *Anal. Bioanal. Chem.* *405*, 7383-7395.
- (20) Lindh, C. H., Kristiansson, M. H., Berg-Andersson, U. A., and Cohen, A. S. (2005) Characterization of adducts formed between human serum albumin and the butadiene metabolite epoxybutanediol. *Rapid Commun. Mass Spectrom.* *19*, 2488-2496.
- (21) Jiao, K., Mandapati, S., Skipper, P. L., Tannenbaum, S. R., and Wishnok, J. S. (2001) Site-selective nitration of tyrosine in human serum albumin by peroxyxynitrite. *Anal. Biochem.* *293*, 43-52.
- (22) Ahmed, N., Dobler, D., Dean, M., and Thornalley, P. J. (2005) Peptide mapping identifies hotspot site of modification in human serum albumin by methylglyoxal involved in ligand binding and esterase activity. *J. Biol. Chem.* *280*, 5724-5732.
- (23) Rao, R. S., and Moller, I. M. (2011) Pattern of occurrence and occupancy of carbonylation sites in proteins. *Proteomics* *11*, 4166-4173.
- (24) Temple, A., Yen, T.-Y., and Gronert, S. (2006) Identification of specific protein carbonylation sites in model oxidations of human serum albumin. *J. Am. Soc. Mass Spectrom.* *17*, 1172-1180.
- (25) Lee, S., Young, N. L., Whetstone, P. A., Cheal, S. M., Benner, W. H., Lebrilla, C. B., and Meares, C. F. (2006) Method to site-specifically identify and quantitate carbonyl end products of protein oxidation using oxidation-dependent element coded affinity tags (O-ECAT) and nanoliquid chromatography Fourier transform mass spectrometry. *J. Proteome Res.* *5*, 539-547.
- (26) Ishii, T., Ito, S., Kumazawa, S., Sakurai, T., Yamaguchi, S., Mori, T., Nakayama, T., and Uchida, K. (2008) Site-specific modification of positively-charged surfaces on human serum albumin by malondialdehyde. *Biochem. Biophys. Res. Commun.* *371*, 28-32.
- (27) Carballal, S., Radi, R., Kirk, M. C., Barnes, S., Freeman, B. A., and Alvarez, B. (2003) Sulfenic acid formation in human serum albumin by hydrogen peroxide and peroxyxynitrite. *Biochemistry* *42*, 9906-9914.
- (28) Alvarez, B., Carballal, S., Turell, L., and Radi, R. (2010) Formation and reactions of sulfenic acid in human serum albumin. *Methods Enzymol.* *473*, 117-136.

- (29) Tannenbaum, S. R., Skipper, P. L., Wishnok, J. S., Stillwell, W. G., Day, B. W., and Taghizadeh, K. (1993) Characterization of various classes of protein adducts. *Environ. Health Perspect.* *99*, 51-55.
- (30) Antunes, A. M., Godinho, A. L., Martins, I. L., Oliveira, M. C., Gomes, R. A., Coelho, A. V., Beland, F. A., and Marques, M. M. (2010) Protein adducts as prospective biomarkers of nevirapine toxicity. *Chem. Res. Toxicol.* *23*, 1714-1725.
- (31) Waidyanatha, S., Troester, M. A., Lindstrom, A. B., and Rappaport, S. M. (2002) Measurement of hemoglobin and albumin adducts of naphthalene-1,2-oxide, 1,2-naphthoquinone and 1,4-naphthoquinone after administration of naphthalene to F344 rats. *Chem.- Biol. Interact.* *141*, 189-210.
